# Supplementary material
Source: PubMed Central journal article supplement (PMC9395282)
Supplement: mmc3.pdf [file mmc3.pdf]

**Table 1. Omicron variant mutations occurrence and prevalence across other variants (7, 12, 13).**

| Types of Mutation                      | The mutation in the Omicron lineage | SARS-CoV-2 variants possessing the same mutation as the omicron variant (VOC, VOI) | First occurrence location                                | Collection date | The accession number of the first discovered viral sequence with the mutation (GISAID) | Mutation revealed in our Research |
|----------------------------------------|-------------------------------------|------------------------------------------------------------------------------------|----------------------------------------------------------|-----------------|----------------------------------------------------------------------------------------|-----------------------------------|
| <b>Non-Structural Protein:1 (NSP1)</b> |                                     |                                                                                    |                                                          |                 |                                                                                        |                                   |
| S135R                                  | BA.2 and BA.3                       | —                                                                                  | Asia / Armenia                                           | 2020-08-03      | EPI_ISL_1854612                                                                        | S135R                             |
| P62T                                   | BA.2                                | Delta                                                                              | North America / USA / Mississippi                        | 2020-11-27      | EPI_ISL_751683                                                                         | P62T                              |
| <b>Non-Structural Protein:2 (NSP2)</b> |                                     |                                                                                    |                                                          |                 |                                                                                        |                                   |
| S378F                                  | BA.2                                | —                                                                                  | Europe / Germany / Hamburg                               | 2020-03-20      | EPI_ISL_775657                                                                         | S378F                             |
| V364G                                  | BA.2                                | —                                                                                  | Europe / Belgium / Antwerp                               | 2021-02-05      | EPI_ISL_1039246                                                                        | V364G                             |
| <b>Non-Structural Protein:3 (NSP3)</b> |                                     |                                                                                    |                                                          |                 |                                                                                        |                                   |
| T24I                                   | BA.2                                | —                                                                                  | Asia / Saudi Arabia / Makkah                             | 2020-04-06      | EPI_ISL_437704                                                                         | T24I                              |
| K38R                                   | BA.1 and BA.1.1                     | —                                                                                  | North America / Canada / Ontario                         | 2020-02         | EPI_ISL_418325                                                                         | K38R                              |
| G489S                                  | BA.2 and BA.3                       | —                                                                                  | Asia / China / Guangdong / Dongguan                      | 2020-01-26      | EPI_ISL_428466                                                                         | G489S                             |
| S1265del                               | BA.1 and BA.1.1                     | —                                                                                  | South America / Brazil / Sao Paulo / Sao Jose dos Campos | 2020-03-09      | EPI_ISL_875545                                                                         | S1265                             |
| L1266I                                 | BA.1 and BA.1.1                     | —                                                                                  | South America / Brazil / Sao Paulo / Sao Jose dos Campos | 2020-03-09      | EPI_ISL_875545                                                                         | L1266I                            |
| A1892T                                 | BA.1 and BA.1.1                     | —                                                                                  | North America / USA / New York / Erie County             | 2020-04-17      | EPI_ISL_1009376                                                                        | —                                 |
| E642K                                  | BA.2                                | —                                                                                  | Asia / India / Odisha                                    | 2020-05-14      | EPI_ISL_463069                                                                         | E642K                             |
| C1392F                                 | BA.1                                | —                                                                                  | Europe / United Kingdom / England                        | 2020            | EPI_ISL_478921                                                                         | C1392F                            |
| L689F                                  | BA.2                                | —                                                                                  | Europe / United Kingdom / England                        | 2020            | EPI_ISL_705553                                                                         | L689F                             |
| A150V                                  | BA.2                                | —                                                                                  | Asia / South Korea / Gwangju                             | 2020-03-03      | EPI_ISL_540999                                                                         | A150V                             |
| <b>Non-Structural Protein:4 (NSP4)</b> |                                     |                                                                                    |                                                          |                 |                                                                                        |                                   |
| L264F                                  | BA.2                                | —                                                                                  | Europe / Italy / Lombardy                                | 2020-02-23      | EPI_ISL_542227                                                                         | L264F                             |

|                                                 |                              |                                       |                                            |            |                 |         |
|-------------------------------------------------|------------------------------|---------------------------------------|--------------------------------------------|------------|-----------------|---------|
| T327I                                           | BA.2 and BA.3                | —                                     | Asia / China / Hubei / Wuhan               | 2019-12-30 | EPI_ISL_402130  | T327I   |
| L438F                                           | BA.2                         | —                                     | North America / USA / Washington           | 2020-03-13 | EPI_ISL_430895  | L438F   |
| T492I                                           | BA.1, BA.2, BA.1.1, and BA.3 | Delta, Mu, Lambda                     | Asia / Georgia                             | 2020-02-28 | EPI_ISL_2896261 | T492I   |
| L447F                                           | BA.2                         | —                                     | Europe / Germany / Lower Saxony / Hannover | 2020       | EPI_ISL_885141  | L447F   |
| <b>Non-Structural Protein:5 (NSP5)</b>          |                              |                                       |                                            |            |                 |         |
| P132H                                           | BA.1, BA.2, BA.1.1, and BA.3 | —                                     | North America / USA / Texas / Houston      | 2020-07-20 | EPI_ISL_5073555 | P132H   |
| <b>Non-Structural Protein:6 (NSP6)</b>          |                              |                                       |                                            |            |                 |         |
| A88V                                            | BA.3                         | —                                     | Europe / Poland / Zachodniopomorskie       | 2020-01-14 | EPI_ISL_2631277 | —       |
| S106del                                         | BA.1, BA.2, BA.1.1, and BA.3 | Alpha, Beta, Gamma                    | North America / USA / New York             | 2020-01-28 | EPI_ISL_3364539 | S106del |
| G107del                                         | BA.1, BA.2, BA.1.1, and BA.3 | Alpha, Beta, Gamma                    | North America / USA / New York             | 2020-01-28 | EPI_ISL_3364539 | G107del |
| F108del                                         | BA.1, BA.2, BA.1.1, and BA.3 | Alpha, Beta, Gamma                    | North America / USA / New York             | 2020-01-28 | EPI_ISL_3364539 | F108del |
| I189V                                           | BA.1 and BA.1.1              | —                                     | Europe / Ireland                           | 2020-03-10 | EPI_ISL_5248210 | I189V   |
| L105del                                         | BA.1                         | —                                     | Africa / Namibia / Khomas                  | 2021-11    | EPI_ISL_7649987 | L105del |
| <b>Non-Structural Protein:12 (NSP12) (RdRp)</b> |                              |                                       |                                            |            |                 |         |
| P323L                                           | BA.1, BA.2, BA.1.1, and BA.3 | Alpha, Beta, Gamma, Delta, Mu, Lambda | Africa / Niger / Niamey                    | 2020-01-01 | EPI_ISL_3804266 | P323L   |
| Q822E                                           | BA.2                         | Delta                                 | Europe / Italy / Lombardy / Pavia          | 2020-04-28 | EPI_ISL_1133148 | Q822E   |
| <b>Non-Structural Protein:13 (NSP13)</b>        |                              |                                       |                                            |            |                 |         |
| R392C                                           | BA.2                         | —                                     | Asia / China / Hubei / Wuhan               | 2020-01-26 | EPI_ISL_493181  | —       |
| <b>Non-Structural Protein:14 (NSP14)</b>        |                              |                                       |                                            |            |                 |         |
| I42V                                            | BA.1, BA.2, BA.1.1, and BA.3 | —                                     | Asia / United Arab Emirates                | 2020-03-15 | EPI_ISL_435127  | I42V    |
| D301E                                           | BA.1                         | Alpha, Delta                          | Europe / Finland / Uusimaa                 | 2020-09-23 | EPI_ISL_759808  | D301E   |
| <b>Non-Structural Protein:15 (NSP15)</b>        |                              |                                       |                                            |            |                 |         |
| T112I                                           | BA.2                         | —                                     | North America / USA / Florida              | 2020-03-19 | EPI_ISL_1379452 | T112I   |

| <b>Spike protein: N-Terminal Domain (NTD)</b>       |                              |                                  |                                         |            |                  |           |
|-----------------------------------------------------|------------------------------|----------------------------------|-----------------------------------------|------------|------------------|-----------|
| T19I                                                | BA.2                         | —                                | North America / USA / Colorado          | 2020-03-17 | EPI_ISL_5439308  | T19I      |
| L24S                                                | BA.2                         | —                                | North America / USA / Washington        | 2020-03-17 | EPI_ISL_570806   | L24del    |
| P25del                                              | BA.2                         | —                                | South America / Brazil / Rio de Janeiro | 2020-04-17 | EPI_ISL_1691459  | P25del    |
| P26del                                              | BA.2                         | —                                | South America / Brazil / Rio de Janeiro | 2020-04-17 | EPI_ISL_1691459  | P26del    |
| A27del                                              | BA.2                         | —                                | South America / Brazil / Rio de Janeiro | 2020-04-17 | EPI_ISL_1691459  | A27S      |
| A67V                                                | BA.1, BA.3, and BA.1.1       | Eta                              | Europe / Spain / Madrid / Madrid        | 2020-03-12 | EPI_ISL_779718   | —         |
| H69del                                              | BA.1, BA.3, and BA.1.1       | Alpha, Eta                       | Asia / Thailand / Nonthaburi            | 2020-01-05 | EPI_ISL_434692   | —         |
| V70del                                              | BA.1, BA.3, and BA.1.1       | Alpha, Eta                       | Asia / Thailand / Nonthaburi            | 2020-01-05 | EPI_ISL_434692   | —         |
| T95I                                                | BA.1, BA.3, and BA.1.1       | Many Delta sublineages, Iota, Mu | Asia / Lebanon                          | 2020-01-10 | EPI_ISL_8311730  | —         |
| G142D                                               | BA.1, BA.2, BA.3, and BA.1.1 | Delta                            | Asia / Japan / Kanto                    | 2020-02-25 | EPI_ISL_479852   | G142D     |
| V143del                                             | BA.1, BA.3, and BA.1.1       | Alpha, Eta                       | Asia / Japan / Kanto                    | 2020-02-25 | EPI_ISL_479852   | V143del   |
| Y144del                                             | BA.1, BA.3, and BA.1.1       | Alpha, Eta, Mu (Y144S)           | Europe / Switzerland / Aargau           | 2020-01-05 | EPI_ISL_896091.3 | Y144del   |
| Y145del                                             | BA.1, BA.3, and BA.1.1       | Alpha, Eta, Mu (Y145N)           | North America / USA / Virginia          | 2020-03-30 | EPI_ISL_429978   | Y145del   |
| N211I                                               | BA.1, BA.3, and BA.1.1       | —                                | North America / USA / Texas / Houston   | 2020-07-14 | EPI_ISL_5343378  | N211del   |
| L212del                                             | BA.1, BA.3, and BA.1.1       | —                                | Europe / Spain / Navarra                | 2020-05-12 | EPI_ISL_1382928  | L212I     |
| V213G                                               | BA.2                         | —                                | Asia / Iran                             | 2020-03-29 | EPI_ISL_672575   | V213G     |
| ins214EPE                                           | BA.1 and BA.1.1              | —                                | Africa / Zambia / Lusaka / Lusaka       | 2021-02-12 | EPI_ISL_7988145  | ins214EPE |
| <b>Spike protein: Receptor Binding Domain (RBD)</b> |                              |                                  |                                         |            |                  |           |
| G339D                                               | BA.1, BA.2, BA.3, and BA.1.1 | —                                | Europe / Norway                         | 2020-03-05 | EPI_ISL_420138   | —         |

|                                                   |                              |                                                                                          |                                                     |            |                 |       |
|---------------------------------------------------|------------------------------|------------------------------------------------------------------------------------------|-----------------------------------------------------|------------|-----------------|-------|
| R346K                                             | BA.1.1                       | Mu                                                                                       | North America / Panama / Cocle                      | 2020-03-18 | EPI_ISL_496747  | —     |
| S371L                                             | BA.1 and BA.1.1              | —                                                                                        | North America / USA / Louisiana / Lincoln Parish    | 2020-12-27 | EPI_ISL_8508546 | S371L |
| S371F                                             | BA.2 and BA.3                | —                                                                                        | Europe / Italy / Campania                           | 2020-05-17 | EPI_ISL_6832115 | S371F |
| S373P                                             | BA.1, BA.2, BA.3, and BA.1.1 | —                                                                                        | North America / USA / Texas / Houston               | 2020-06-04 | EPI_ISL_545554  | S373P |
| S375F                                             | BA.1, BA.2, BA.3, and BA.1.1 | —                                                                                        | Africa / Egypt / Cairo                              | 2020-06-08 | EPI_ISL_1097025 | S375F |
| T376A                                             | BA.2                         | —                                                                                        | Asia / Japan / Saitama                              | 2021-06-09 | EPI_ISL_3198900 | T376A |
| D405N                                             | BA.2 and BA.3                | —                                                                                        | Europe / Portugal                                   | 2021-02-09 | EPI_ISL_1116795 | D405N |
| R408S                                             | BA.2                         | —                                                                                        | Europe / Netherlands / Zuid-Holland                 | 2020-03-27 | EPI_ISL_422951  | R408S |
| K417N                                             | BA.1, BA.2, BA.3, and BA.1.1 | Beta, Gamma (K417T), Delta variant                                                       | Asia / Qatar / Doha                                 | 2020-03-27 | EPI_ISL_2274264 | K417N |
| <b>Spike Protein: Receptor Binding Motif(RBM)</b> |                              |                                                                                          |                                                     |            |                 |       |
| N440K                                             | BA.1, BA.2, BA.3, and BA.1.1 | —                                                                                        | North America / Canada / Quebec                     | 2020-03-10 | EPI_ISL_3458197 | N440K |
| G446S                                             | BA.1, BA.3, and BA.1.1       | —                                                                                        | Europe / United Kingdom / England                   | 2020-04-04 | EPI_ISL_440772  | G446S |
| S477N                                             | BA.1, BA.2, BA.3, and BA.1.1 | —                                                                                        | Asia / Lebanon                                      | 2020-01-10 | EPI_ISL_8317205 | —     |
| T478K                                             | BA.1, BA.2, BA.3, and BA.1.1 | Delta                                                                                    | North America / USA / New York / Westchester County | 2020-03-12 | EPI_ISL_6661895 | —     |
| E484A                                             | BA.1, BA.2, BA.3, and BA.1.1 | Beta (E484K), Gamma (E484K), Eta (E484K), Iota (E484K), Mu (E484K), Kappa, Delta (E484Q) | Europe / Spain / La Rioja                           | 2020-03-03 | EPI_ISL_578200  | —     |
| Q493R                                             | BA.1, BA.2, BA.3, and BA.1.1 | —                                                                                        | Europe / United Kingdom / England                   | 2020-04-22 | EPI_ISL_470150  | —     |
| G496S                                             | BA.1 and BA.1.1              | —                                                                                        | Africa / Egypt                                      | 2020-06-06 | EPI_ISL_8194875 | —     |
| Q498R                                             | BA.1, BA.2, BA.3, and BA.1.1 | —                                                                                        | North America / USA / Louisiana / Lincoln Parish    | 2020-12-27 | EPI_ISL_8508546 | —     |
| N501Y                                             | BA.1, BA.2, BA.3, and BA.1.1 | Alpha, Beta, Gamma, Mu                                                                   | Europe / Spain / Castilla y Leon                    | 2020-02-07 | EPI_ISL_1603195 | —     |

|                                                       |                              |                                                         |                                               |            |                  |       |
|-------------------------------------------------------|------------------------------|---------------------------------------------------------|-----------------------------------------------|------------|------------------|-------|
| Y505H                                                 | BA.1, BA.2, BA.3, and BA.1.1 | —                                                       | Europe / United Kingdom / England             | 2020-04-17 | EPI_ISL_465212   | —     |
| <b>Spike protein: Subdomain1/Subdomain (SD1/SD2)</b>  |                              |                                                         |                                               |            |                  |       |
| T547K                                                 | BA.1 and BA.1.1              | —                                                       | North America / USA / Florida                 | 2020-03-20 | EPI_ISL_1379457  | T547K |
| D614G                                                 | BA.1, BA.2, BA.3, and BA.1.1 | Alpha, Beta, Gamma, Delta, Kappa, Eta, Iota, Lambda, Mu | Africa / Niger / Niamey                       | 2020-01-01 | EPI_ISL_3804266  | D614G |
| H655Y                                                 | BA.1, BA.2, BA.3, and BA.1.1 | Gamma                                                   | Europe / France / Île-de-France / Paris       | 2020-01-23 | EPI_ISL_1301441  | H655Y |
| <b>Spike protein: Poly-Basic Cleavage Site (PBCS)</b> |                              |                                                         |                                               |            |                  |       |
| N679K                                                 | BA.1, BA.2, BA.3, and BA.1.1 | —                                                       | North America / USA / New York / Brooklyn     | 2020-03-18 | EPI_ISL_421580   | N679K |
| P681H                                                 | BA.1, BA.2, BA.3             | Alpha, Mu, Delta (P681R), Kappa (P681R), A.23.1 (P681R) | Africa / Niger / Niamey                       | 2020-01-01 | EPI_ISL_3804266  | P681H |
| <b>Spike protein: C-Terminal Domain (CTD)</b>         |                              |                                                         |                                               |            |                  |       |
| N764K                                                 | BA.1, BA.2, BA.3, and BA.1.1 | —                                                       | Africa / Egypt / Cairo                        | 2020-06-08 | EPI_ISL_1097025  | N764K |
| D796Y                                                 | BA.1, BA.2, BA.3, and BA.1.1 | —                                                       | Europe / United Kingdom / Scotland            | 2020-03-29 | EPI_ISL_433364   | D796Y |
| N856K                                                 | BA.1 and BA.1.1              | —                                                       | Asia / China / Hubei / Wuhan                  | 2020-01-25 | EPI_ISL_493156   | N856K |
| Q954H                                                 | BA.1, BA.2, BA.3, and BA.1.1 | —                                                       | Africa / South Africa / North West            | 2020-06-29 | EPI_ISL_8182884  | Q954H |
| N969K                                                 | BA.1, BA.2, BA.3, and BA.1.1 | —                                                       | North America / USA / Maryland                | 2020-05-31 | EPI_ISL_3098538  | N969K |
| L981F                                                 | BA.1 and BA.1.1              | —                                                       | North America / USA / Wisconsin / Dane County | 2020-04-17 | EPI_ISL_450716   | L981F |
| <b>ORF3a (NS3a)</b>                                   |                              |                                                         |                                               |            |                  |       |
| T223I                                                 | BA.2 and BA.3                | —                                                       | Asia / India / Himachal Pradesh               | 2020-02-24 | EPI_ISL_2099688  | T223I |
| L65F                                                  | BA.2                         | —                                                       | Asia / India / Chhattisgarh / Raipur          | 28-01-2022 | EPI_ISL_10716789 | L65F  |
| <b>E-protein</b>                                      |                              |                                                         |                                               |            |                  |       |
| T9I                                                   | BA.1, BA.2, BA.1.1, and BA.3 | —                                                       | North America / USA / Washington              | 2020-03-12 | EPI_ISL_476911   | T9I   |
| L18I                                                  | BA.2                         | Gamma                                                   | North America / USA / Washington              | 2020-03-28 | EPI_ISL_486047   | L18I  |

| <b>M-protein</b> |                              |                      |                                                     |            |                 |        |
|------------------|------------------------------|----------------------|-----------------------------------------------------|------------|-----------------|--------|
| D3G              | BA.1 and BA.1.1              | —                    | Asia / China / Guangxi / Nanning                    | 2020-02-19 | EPI_ISL_6951243 | —      |
| Q19E             | BA.1, BA.2, BA.1.1, and BA.3 | —                    | North America / USA / New York / Brooklyn           | 2020-03-27 | EPI_ISL_456032  | Q19E   |
| A63T             | BA.1, BA.2, BA.1.1, and BA.3 | —                    | Europe / United Kingdom / Scotland                  | 2020-03-23 | EPI_ISL_425915  | A63T   |
| <b>ORF6</b>      |                              |                      |                                                     |            |                 |        |
| D61L             | BA.2                         | —                    | N/A                                                 | N/A        | N/A             | —      |
| <b>ORF7a</b>     |                              |                      |                                                     |            |                 |        |
| L17F             | BA.2, BA.1                   | —                    | Europe / United Kingdom / England                   | 2021-12-15 | EPI_ISL_8042383 | L17F   |
| <b>N-protein</b> |                              |                      |                                                     |            |                 |        |
| P13L             | BA.1, BA.2, BA.1.1, and BA.3 | Lambda               | Oceania / Papua New Guinea                          | 2020-01-13 | EPI_ISL_1307662 | P13L   |
| E31del           | BA.1, BA.2, BA.1.1, and BA.3 | —                    | Africa / Egypt / Cairo                              | 2020-06-06 | EPI_ISL_1167190 | E31del |
| R32del           | BA.1, BA.2, BA.1.1, and BA.3 | —                    | Africa / Egypt / Cairo                              | 2020-06-06 | EPI_ISL_1167190 | R32del |
| S33del           | BA.1, BA.2, BA.1.1, and BA.3 | —                    | Africa / Egypt / Cairo                              | 2020-06-06 | EPI_ISL_1167190 | S33del |
| R203K            | BA.1, BA.2, BA.1.1, and BA.3 | Alpha, Gamma, Lambda | Oceania / Australia / New South Wales / Sydney      | 2020-01-08 | EPI_ISL_3568416 | R203K  |
| R203M            | BA.2, BA.1                   | Delta                | Europe / Switzerland / Geneva                       | 2020-03    | EPI_ISL_548226  | R203M  |
| G204R            | BA.1, BA.2, BA.1.1, and BA.3 | Alpha, Gamma, Lambda | Oceania / Australia / New South Wales / Sydney      | 2020-01-08 | EPI_ISL_3568416 | G204R  |
| S413R            | BA.2 and BA.3                | —                    | Africa / Egypt                                      | 2020-06-24 | EPI_ISL_2380075 | S413R  |
| G215C            | BA.2                         | Delta                | North America / USA / New York / Westchester County | 2020-03-12 | EPI_ISL_6661895 | G215C  |

#### References

12. Abbas Q, Kusakin A, Sharrouf K, et al. Follow-up investigation and detailed mutational characterization of the SARS-CoV-2 Omicron variant lineages Keywords: Various nomenclatures for Omicron Omicron lineages. bioRxiv 2022;2:1-37.
13. CoVariants. Published 2022. <https://covariants.org>. (Accessed July 15, 2022).
